# Supplementary material
Source: publisher site journal article supplement (https://www.dovepress.com/article/410000)
Supplement: Supplementary file 1 [file get_supplementary_file.php]

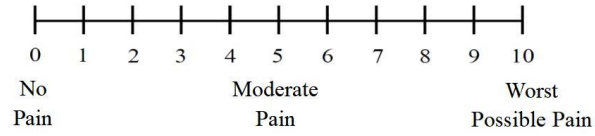

Please mark the menstrual period by circling the dates.

|                    |           |           |           |           |           |           |           |           |           |           |           |           |           |           |           |           |
|--------------------|-----------|-----------|-----------|-----------|-----------|-----------|-----------|-----------|-----------|-----------|-----------|-----------|-----------|-----------|-----------|-----------|
| <b>Month</b> _____ | <b>1</b>  | <b>2</b>  | <b>3</b>  | <b>4</b>  | <b>5</b>  | <b>6</b>  | <b>7</b>  | <b>8</b>  | <b>9</b>  | <b>10</b> | <b>11</b> | <b>12</b> | <b>13</b> | <b>14</b> | <b>15</b> |           |
| Worst pain         |           |           |           |           |           |           |           |           |           |           |           |           |           |           |           |           |
| Average pain       |           |           |           |           |           |           |           |           |           |           |           |           |           |           |           |           |
|                    | <b>16</b> | <b>17</b> | <b>18</b> | <b>19</b> | <b>20</b> | <b>21</b> | <b>22</b> | <b>23</b> | <b>24</b> | <b>25</b> | <b>26</b> | <b>27</b> | <b>28</b> | <b>29</b> | <b>30</b> | <b>31</b> |
| Worst pain         |           |           |           |           |           |           |           |           |           |           |           |           |           |           |           |           |
| Average pain       |           |           |           |           |           |           |           |           |           |           |           |           |           |           |           |           |

|                    |           |           |           |           |           |           |           |           |           |           |           |           |           |           |           |           |
|--------------------|-----------|-----------|-----------|-----------|-----------|-----------|-----------|-----------|-----------|-----------|-----------|-----------|-----------|-----------|-----------|-----------|
| <b>Month</b> _____ | <b>1</b>  | <b>2</b>  | <b>3</b>  | <b>4</b>  | <b>5</b>  | <b>6</b>  | <b>7</b>  | <b>8</b>  | <b>9</b>  | <b>10</b> | <b>11</b> | <b>12</b> | <b>13</b> | <b>14</b> | <b>15</b> |           |
| Worst pain         |           |           |           |           |           |           |           |           |           |           |           |           |           |           |           |           |
| Average pain       |           |           |           |           |           |           |           |           |           |           |           |           |           |           |           |           |
|                    | <b>16</b> | <b>17</b> | <b>18</b> | <b>19</b> | <b>20</b> | <b>21</b> | <b>22</b> | <b>23</b> | <b>24</b> | <b>25</b> | <b>26</b> | <b>27</b> | <b>28</b> | <b>29</b> | <b>30</b> | <b>31</b> |
| Worst pain         |           |           |           |           |           |           |           |           |           |           |           |           |           |           |           |           |
| Average pain       |           |           |           |           |           |           |           |           |           |           |           |           |           |           |           |           |

Supplementary Figure 1: Cardiff Breast Pain Chart
